# Supplementary material
Source: PubMed Central journal article supplement (PMC4250367)

**Supplemental Figure 1. Generation of IRS2 KO mice with overexpression of HGF in  $\beta$ -cells.** **(A)** Schematic representation of mouse breedings performed to generate IRS2 deficient RIP-HGF transgenic mice overexpressing HGF in the  $\beta$ -cell. Only mice in F2 were used in this study. **(B)** Representative western blot of islet extracts from the mice obtained in F2 and blotted against IRS2 and actin. Notice the absence of IRS2 in islet extracts from IRS2 KO and TG/KO mice. This experiment was repeated twice. **(C)** Representative photomicrographs of pancreatic sections from 12 weeks old mice obtained from F2 and stained for HGF or IRS2. Notice the absence of IRS2 staining in KO and TG/KO tissue sections and the strong staining for HGF in the islet of TG and TG/KO mice. This was repeated in pancreas sections of two mice per genotype with identical results.

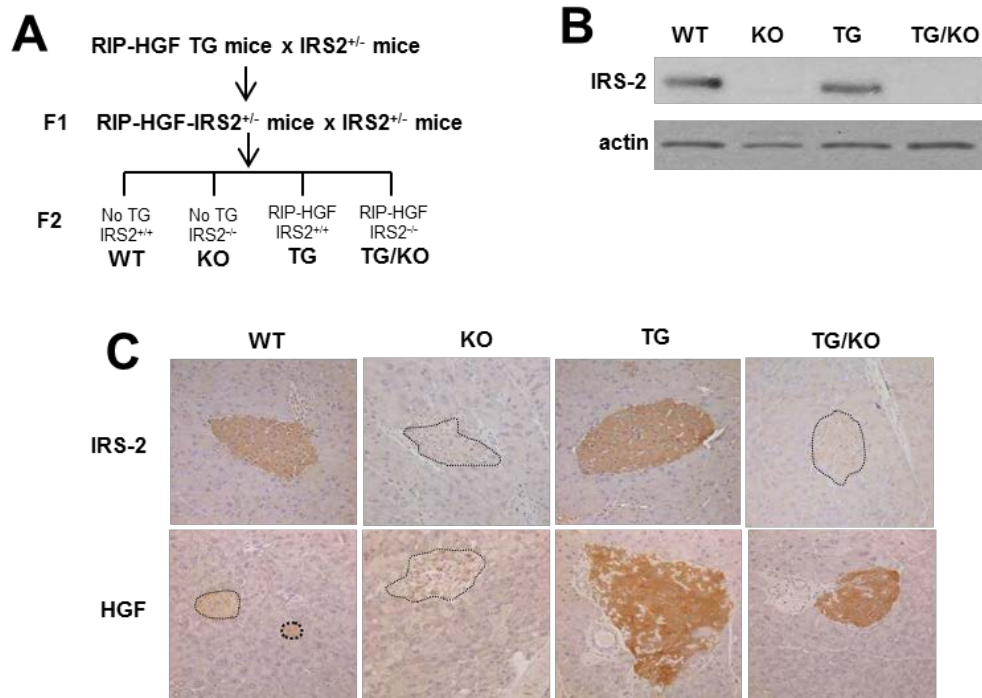

Supplement: me-14-1207.pdf [file me-14-1207.pdf]
